# Supplementary material
Source: PubMed Central journal article supplement (PMC3204383)

# Supplemental Figure II

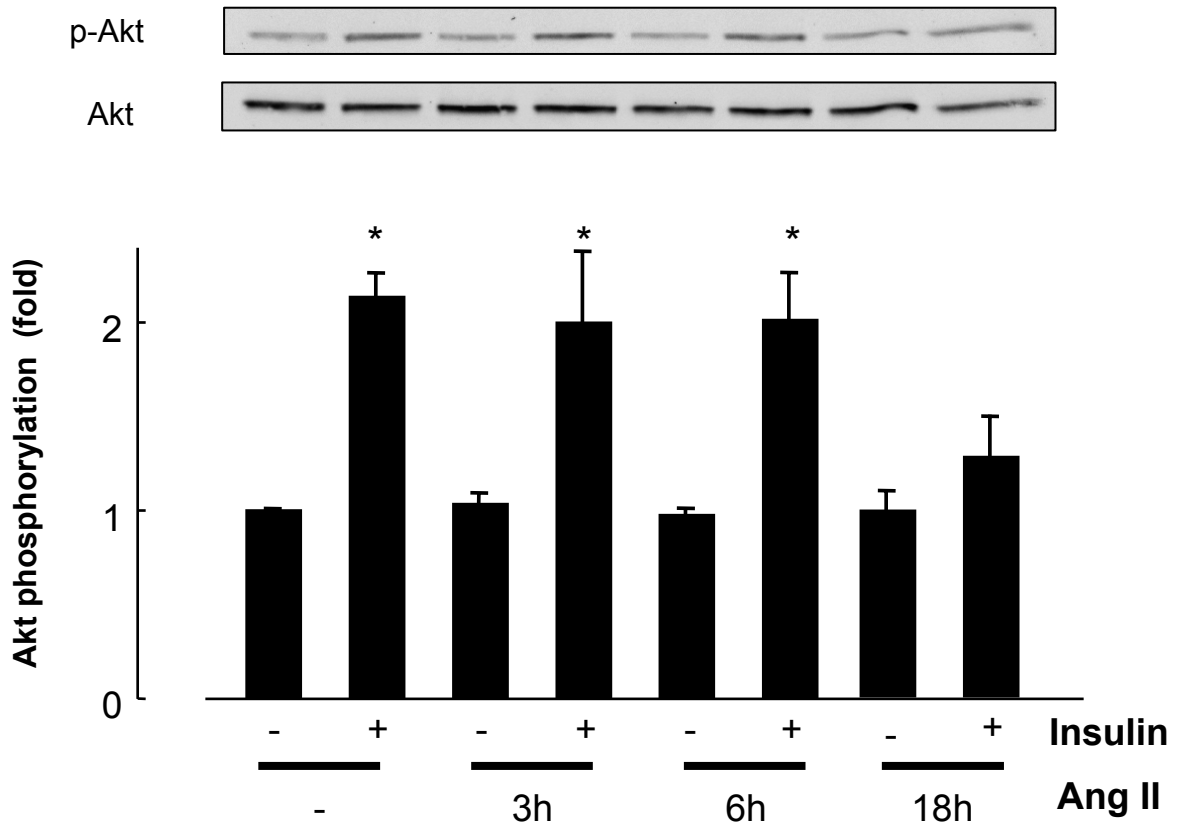

Supplement: NIHMS317635-supplement-Supplemental_Figure_2.pdf [file NIHMS317635-supplement-Supplemental_Figure_2.pdf]

# Supplemental Figure IV

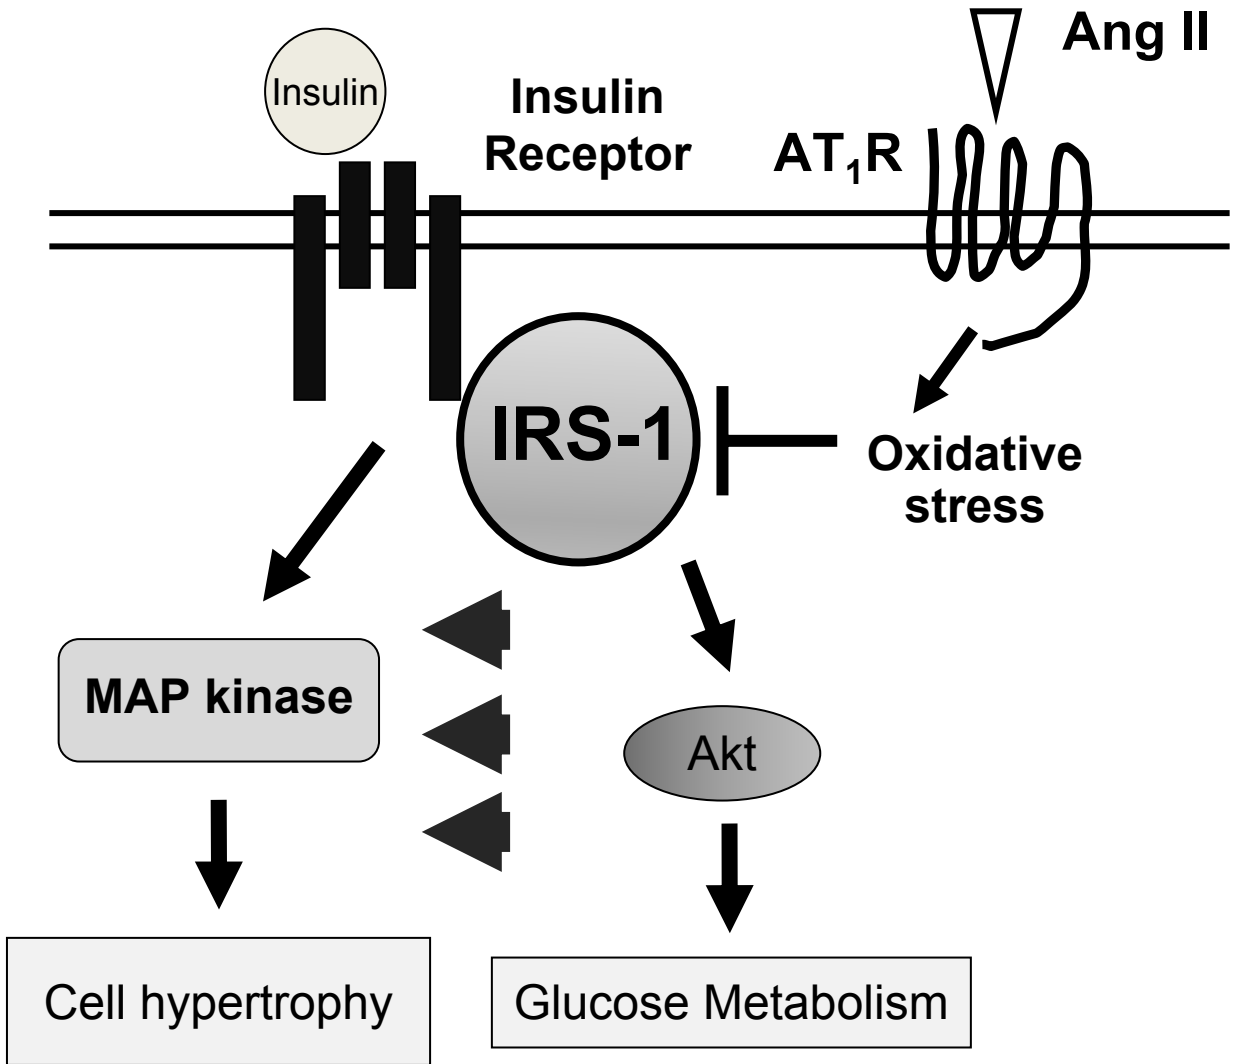

Supplement: NIHMS317635-supplement-Supplemental_Figure_4.pdf [file NIHMS317635-supplement-Supplemental_Figure_4.pdf]
